# Supplementary material for: Spatiotemporal snow water storage uncertainty in the midlatitude American Cordillera
Source: Copernicus journal article supplement (doi:10.5194/egusphere-2023-814), 2023-04-28
Supplement: Supplementary file [file egusphere-2023-814-AC2-supplement.pdf]

We would like to thank the reviewer for your thorough reviews and valuable comments on the manuscript. The responses to reviewer comments are shown in blue font, proposed additions and revisions of the manuscript are shown in red font, and any original manuscript text is shown in gray font. Figure R1 – R4 are used only in the response document.

## Review #1

### MAJOR COMMENTS

1. The paper's goal is to characterize uncertainty in snow water storage. This is more feasible when done across all scales (10 products in WUS, 8 products in Andes), however I think there are too few datasets to assess uncertainty within a given spatial resolution (e.g., HR and MR). In other words, having only 1 or 2 models in a given resolution does not make it possible to quantify uncertainty with confidence (i.e., it becomes one model versus another). This is not the fault of the authors per se, as they are generally using what is readily available. While recognizing the significant work that has already been done, I might suggest adding additional HR and MR datasets as feasible. For WUS, two readily available and well-known daily SWE datasets are SWE reconstruction at 500 m (e.g., Bair et al., 2023) and DayMet SWE at 1 km (e.g., Thornton et al., 2022). Including other SWE datasets such as these would help to better characterize uncertainty at finer spatial scales and would represent more distinct approaches that are not currently represented in the study (e.g., SWE reconstruction). I would argue that having a more comprehensive sampling of existing SWE datasets would elevate the utility of the paper to the community.

We appreciate this comment. Our categorization of datasets as HR, MR, and LR were not designed to make definitive conclusions based on resolution (for reasons pointed out by the reviewer), but rather as a framework for discussion and to point at some general variations that seem to occur as a function of resolution. Given that the Bair et al. (2023) dataset came out after submission of this paper, we would argue that the extra analysis requested is a heavy burden that could instead be done in future work. As for the DayMet product, the modeled SWE is based on a simple temperature driven model and therefore is in a bit of a different class than the other products (and would also require a significant amount of more analysis for the paper). We agree that further analysis could be warranted and therefore reference both datasets will be added in the conclusions as datasets that should be examined in the context of this and other intercomparison analysis (along with other datasets that will continue to become available).

**“New and future SWE products such as the recently published SWE reconstruction at 500 m (Bair et al., 2023), and other products such as DayMet SWE at 1 km (Thornton et al., 2022) could be examined to further characterize uncertainty in higher resolution products.”**

2. The SWE product intercomparison focuses on the “snow accumulation season” (L. 135-145), which is defined as the period before peak SWE (L. 139-140). However the accumulation season is not always well-defined in all years, locations, and spatial scales. For instance, snow may be more intermittent in lower elevations, in drier years, and/or at coarser spatial scales. Notably, the timing of peak SWE varies in these cases (as across the products in Figure 2), which suggests that the uncertainty in snow water storage may be larger at other times in the year (e.g., March 1 in WUS). Hence, I am wondering about

whether peak SWE is necessarily the most robust way to characterize uncertainty across snow products? In addition to the analyses presented, it could be helpful to characterize the uncertainty in time (e.g., by dowy) rather than just by a fixed point (e.g., peak SWE).

Thank you for your comment. The rationale for focusing on the pixel-wise accumulation season is that much of the uncertainty comes from the accumulation season and that accumulation errors/differences then propagate to the melt season. It is a valid point that the accumulation season definition may not be optimal for intermittent snow and/or snow in extremely dry years. However, we use the same definition of accumulation season for all years, locations, and spatial scales for consistency over multiple products. It is expected that the key results do not qualitatively change if another proxy date for peak SWE is used (shown below). Hence, we would prefer to keep the current focus on peak SWE and the accumulation season in the main manuscript text.

Additional analyses (will be added in the SI) for March 1<sup>st</sup> and April 1<sup>st</sup> SWE confirm that similar uncertainty conclusions are reached as those when using pixel-wise peak SWE.

#### “S4. Climatological March 1st SWE and April 1st SWE

Overall, the relative uncertainties of climatological  $SWE_{peak}$  over the WUS (Figure 3k) and Andes (Figure 4i) are consistent with uncertainties of March 1<sup>st</sup> and April 1<sup>st</sup> SWE across different products (Figure S6). In the WUS, HR and MR products generally agree with the WUS-SR, whereas LR products underestimate SWE. The WUS-SR average  $SWE_{peak}$ , March 1<sup>st</sup> and April 1<sup>st</sup> SWE values are 269, 185 and 150 km<sup>3</sup>, respectively. In comparison, the averaged  $SWE_{peak}$ , March 1<sup>st</sup> and April 1<sup>st</sup> SWE values from HR and MR products are 284, 185 and 168 km<sup>3</sup>, respectively. Thus, for HR and MR products, March 1<sup>st</sup> SWE has the lowest bias (0%) followed by  $SWE_{peak}$  (overestimated by 6%), and April 1<sup>st</sup> SWE (12%). For LR products, the averaged  $SWE_{peak}$ , March 1<sup>st</sup> and April 1<sup>st</sup> SWE values are 127, 75 and 43 km<sup>3</sup>, respectively. The lowest bias is from  $SWE_{peak}$  (underestimated by 53%), followed by March 1<sup>st</sup> (59%) and April 1<sup>st</sup> SWE (71%).

In the Andes, Andes-SR shows that  $SWE_{peak}$  is 29 km<sup>3</sup>, March 1<sup>st</sup> SWE is 26 km<sup>3</sup> and April 1<sup>st</sup> SWE is 24 km<sup>3</sup>. The average values for MR and LR are 19, 14 and 13 km<sup>3</sup>, respectively.  $SWE_{peak}$  has the lowest bias (34%), followed by March 1<sup>st</sup> and April 1<sup>st</sup> SWE with the same level of bias (46%).

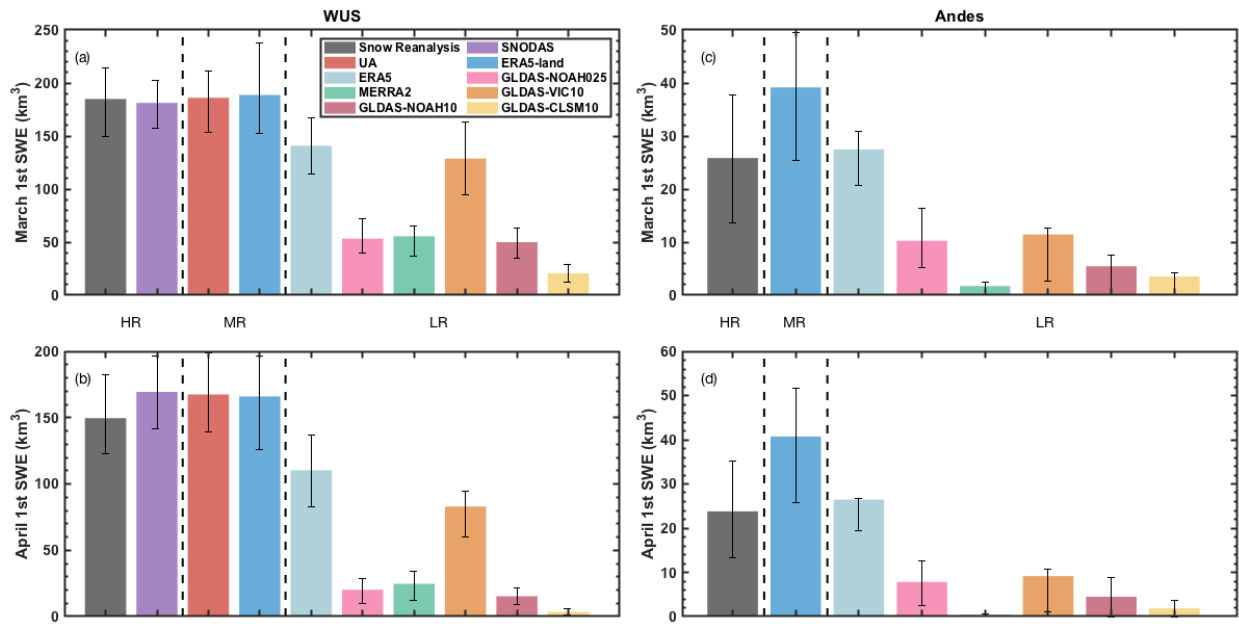

Figure S3. Climatological March 1<sup>st</sup> SWE (top panels) and April 1<sup>st</sup> SWE (bottom panels) over the WUS (left panels) and Andes (right panels). Black error bars represent the interannual inter-quartile range (IQR).”

3. Section 4.1 analyses spatial variations in peak SWE across the study regions and with respect to windward/leeward basins. One aspect that would be useful to analyze and compare across products is the lapse rate in peak SWE across the windward/leeward sides. While peak SWE is lower in the LR products and higher in the HR products (Figures 5-6), it must be remembered that the LR products have less variation in elevation than the HR products. As such, I think this should be normalized in order to assess how the elevation gradients in peak SWE compare across products. This would be potentially important to know for certain applications (e.g., downscaling a LR product to higher resolution).

Thank you for your suggestion regarding the lapse rate in peak SWE. Additional analysis and Figure 7 will be added in the main text as shown below:

“The elevational distributions of bin-averaged climatological  $swe_{peak}$  in the Sierra Nevada (Figure 7a) and Andes (Figure 7b) are plotted to compare the elevational gradient of windward and leeward  $swe_{peak}$  from products with different spatial resolution. The lapse rate in  $swe_{peak}$  was determined by linear regression of  $swe_{peak}$  averaged across elevational bins with variations identified in the snow reanalysis reference datasets (Text S5). Lapse rates from GLDAS products at 1.0° are not included because the subdomains analyzed are covered by less than 10 pixels (Figure S7 and S8).

Based on the WUS-SR, climatological  $swe_{peak}$  on the windward side of the Sierra Nevada monotonically increases up to ~3.5 km. Across different products, the uncertainty of  $swe_{peak}$  is smaller at the lower elevation ~ 1-1.5 km, however, the differences in lapse rate project to larger  $swe_{peak}$  uncertainty as elevation increases. The gradients of windward  $swe_{peak}$  (i.e.,  $d(swe_{peak})/dz$ ) from WUS-SR, averaged over HR and MR products, and averaged over LR products are 0.40 m/km, 0.38 m/km, and 0.10 m/km, respectively. On the leeward side of the Sierra Nevada, the  $swe_{peak}$  increases monotonically with elevation from 1 – 3.5 km in the WUS-SR and most of the other products. Similarly, the uncertainty of

$swe_{peak}$  is smaller at low elevation from 1 – 1.5 km and gradually increases with elevation corresponding with the differences in lapse rate across different products. The gradients of leeward  $swe_{peak}$  (i.e.,  $d(swe_{peak})/dz$ ) from WUS-SR, averaged over HR and MR products, and averaged over LR products are 0.22 m/km, 0.23 m/km, and 0.13 m/km, respectively. HR and MR products have qualitatively similar elevational distributions of  $swe_{peak}$  on both the leeward and windward side of the Sierra Nevada for elevations below 3 km, whereas that  $swe_{peak}$  from LR are underestimated with large differences in lapse rates compared to WUS-SR.

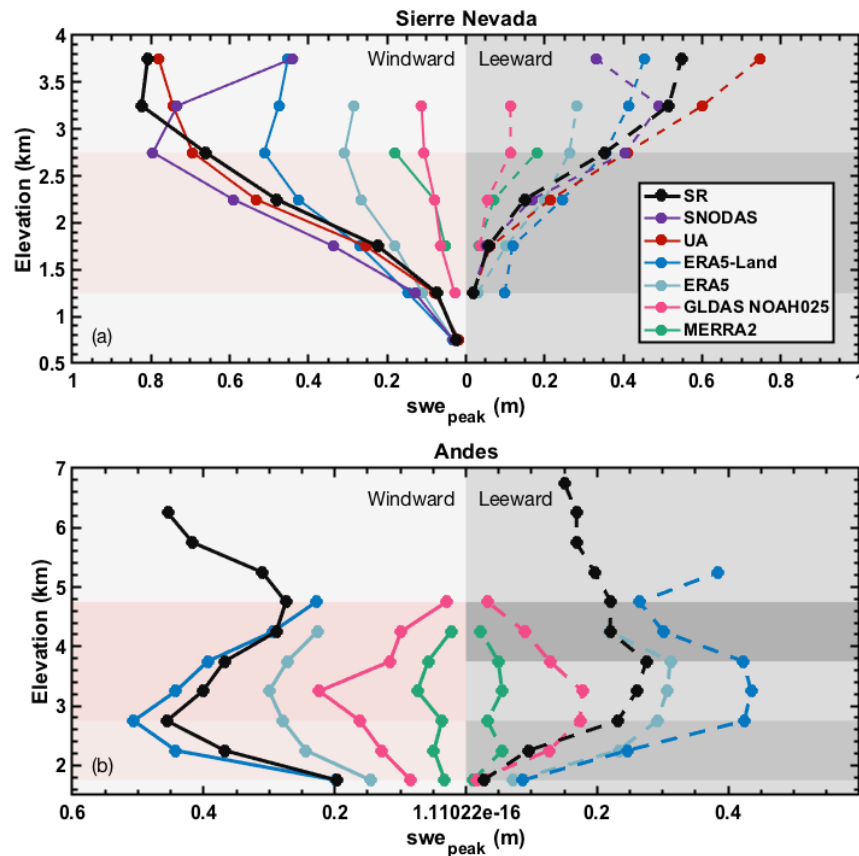

Figure 7. Elevational distribution of windward and leeward  $swe_{peak}$  in the Sierra Nevada and Andes across reference datasets and products with spatial resolution higher than  $1^\circ$ . Each dot represents the elevation bin-averaged  $swe_{peak}$ . The interval of each bin is set to be 0.5 km. GLDAS products at  $1^\circ$  are not included for comparison due to too few points. On the windward side of the subdomains, dots within the red shaded areas are used to compute lapse rates. On the leeward side, dots in the darker shaded areas are used to compute lapse rates.

On the windward side of the Andes,  $swe_{peak}$  from the Andes-SR increases from 1.5 – 3 km, with decreases between 3 and 5 km. The  $swe_{peak}$  uncertainty is smaller at low elevation bands between 1.5 - 2 km. The uncertainty gets larger as elevation increases from 2 – 3 km corresponding to large differences in positive lapse rates. In contrast, large differences in negative lapse rates above 3 km reduces the uncertainty as elevation increases. The lapse rates of windward  $swe_{peak}$  from the Andes-SR are 0.4 m/km between elevation bands of 1.5 – 3 km and -0.16 m/km between 2.5 – 5 km (Table S1). On the leeward side,  $swe_{peak}$  increases between 1.5 – 4 km and slightly decrease above 4 km in the Andes-SR. Similar to

the windward side, differences in positive lapse rate below 3 km project to larger  $swe_{peak}$  uncertainty as elevation increases from 1.5 km, whereas differences in negative lapse reduces uncertainty as elevation increases above 3 km. The lapse rates of windward  $swe_{peak}$  from the Andes-SR are 0.27 m/km between elevations of 1.5 – 3 km, and -0.03 m/km between 3.5 – 5 km.”

In the SI, we will add a table of lapse rates and plots of the elevational distribution  $swe_{peak}$  for all products.

“Text S1. The lapse rates were determined based on linear regressions across elevational bins in the Sierra Nevada and Andes based on the  $swe_{peak}$  distribution from the snow reanalysis datasets (Table S1). Specifically,  $swe_{peak}$  increases with elevation on both the windward and leeward side of the Sierra Nevada from 1 – 3 km. In the Andes,  $swe_{peak}$  increases with elevation over 1.5 – 3 km on both sides of the Andes, whereas it decreases with elevation over 2.5 – 5 km on the windward side and 3.5 – 5 km on the leeward side. Figure S7 and S8 shows that GLDAS products at 1° do not have enough data points to compute the lapse rates and therefore are excluded in the analysis.

Table S1. Derived  $swe_{peak}$  lapse rates over the Sierra Nevada and Andes across different elevational bands. The unit of lapse rate is m (SWE)/km (elevation) with a positive value representing an increase of  $swe_{peak}$  in meters per increase of elevation in kilometers.

| Domain              | Sierra Nevada |         | Andes      |         |            |            |
|---------------------|---------------|---------|------------|---------|------------|------------|
|                     | Windward      | Leeward | Windward   | Leeward | Windward   | Leeward    |
| Elevation           | 1 – 3 km      |         | 1.5 – 3 km |         | 2.5 – 5 km | 3.5 – 5 km |
| WUS-SR/<br>Andes-SR | 0.40          | 0.22    | 0.40       | 0.27    | -0.16      | -0.03      |
| SNODAS              | 0.45          | 0.26    | -          | -       | -          | -          |
| UA                  | 0.43          | 0.26    | -          | -       | -          | -          |
| ERA5-Land           | 0.25          | 0.18    | 0.34       | 0.44    | -0.21      | -0.17      |
| ERA5                | 0.14          | 0.16    | 0.07       | 0.26    | -0.08      | -0.18      |
| GLDAS-NOAH025       | 0.05          | 0.08    | 0.09       | 0.13    | -0.02      | 0.06       |
| MERRA2              | 0.13          | 0.15    | 0.03       | 0.03    | -0.03      | 0.02       |

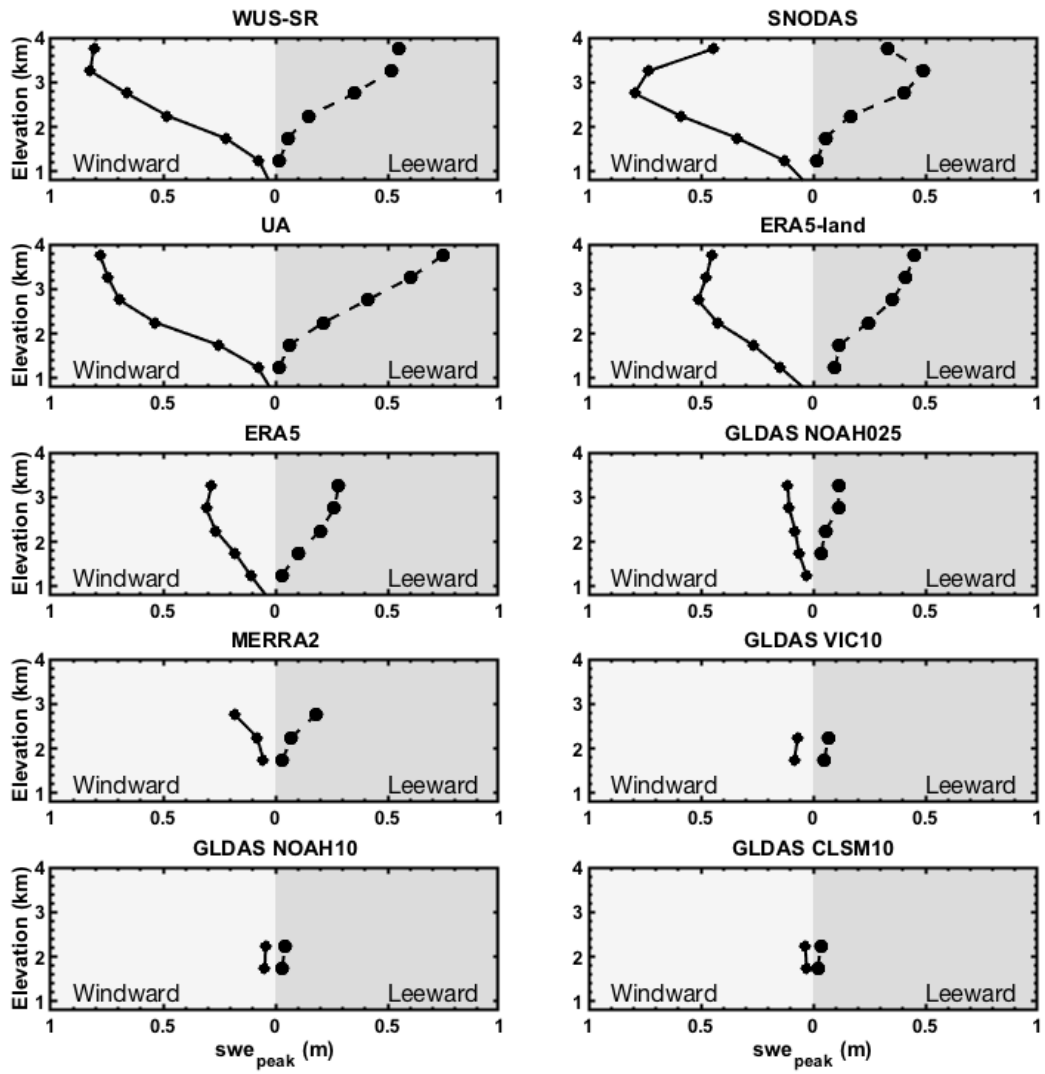

Figure S7. Elevational distribution of windward and leeward  $swe_{peak}$  across the Sierra Nevada. The black dots are bin-averaged  $swe_{peak}$  values.

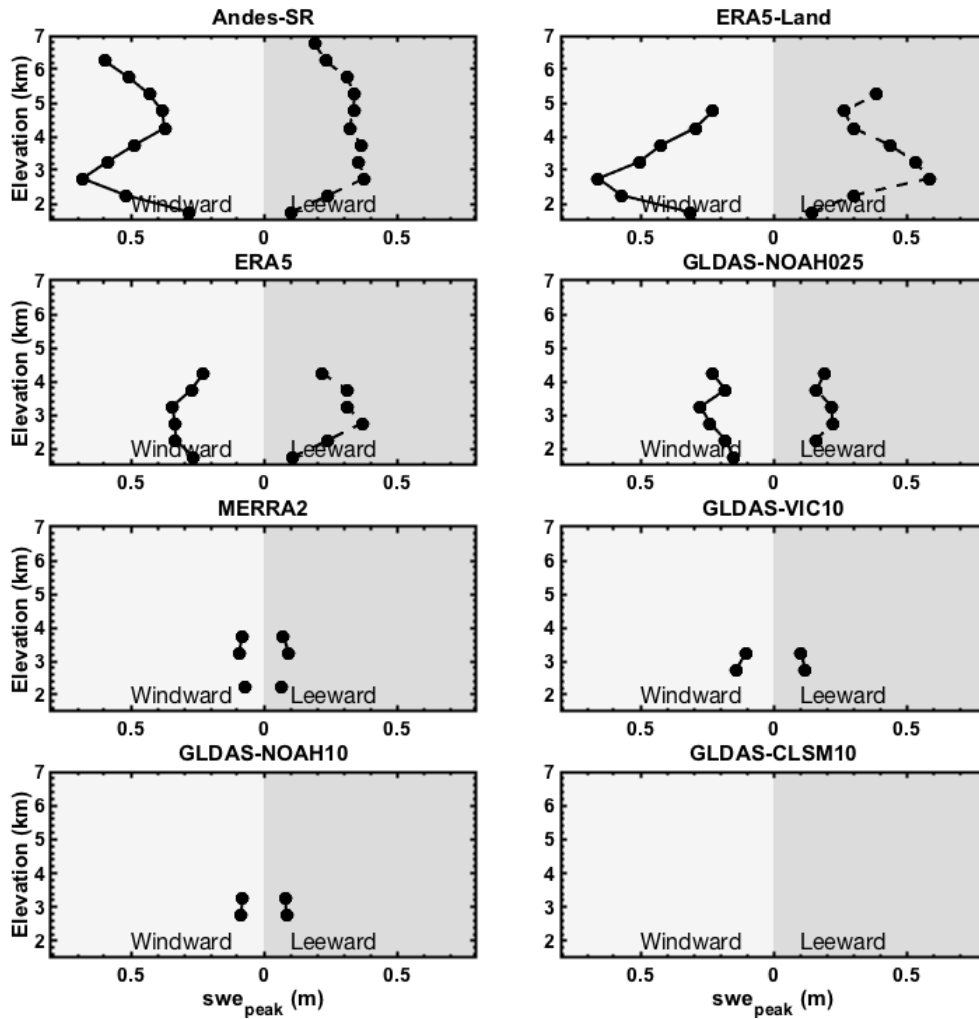

Figure S8. Elevational distribution of windward and leeward  $swe_{peak}$  across the Andes. The black dots are bin-averaged  $swe_{peak}$  values.”

### GENERAL COMMENTS

- Please make consistent use of the acronym for the low/coarse resolution products. Sometimes it is “CR” and sometimes “LR”. Please select one convention only and use it consistently.

Thanks for catching this error. We will replace “CR” with “LR” throughout the manuscript.

### LINE COMMENTS

- Line 57: It may be worth noting the mountain ranges are also disparate with respect to elevation.

This sentence will be revised to:

“The WUS and Andes domains have comparable atmospheric circulation patterns and hydrologic cycles (Rhoades et al., 2022), but are disparate with respect to **elevation and** the amount of available in situ information.”

- Line 75: Delete “shows that”.

“shows that” will be deleted.

- Line 112: Add “satellite snow cover” before “observations”.

“satellite snow cover” will be added before “observations”:

“The snow reanalysis reference datasets are, by design, constrained by **satellite snow cover** observations using a data assimilation approach.”

- Line 131-134: I think this climatological analyses could be of interest, and would request their inclusion in the supplement document.

We will add climatological analysis from WYs 2004 to 2021 in WUS and from WYs 2001 to 2015 in the Andes in the supplemental information. The additional analysis is shown below:

“In the WUS, GLDAS products are only available over Water Years (WYs) 2001 to 2021, and SNODAS is only available over WYs 2004 to 2021, while all other products span the 37-year record (WYs 1985 to 2021). In the Andes, the GLDAS products are only available over WYs 2001 to 2015, while all other products span the 31-year record (WYs 1985 to 2015).

The climatological SWE over the longer study periods agrees well with climatological SWE over the shorter periods (Figure S1). In WUS, climatological SWE from SNODAS, UA and ERA5-Land are comparable with WUS-SR for either time period used whereas other products underestimate SWE volumes in both cases. In the Andes, over both time periods, ERA5-Land overestimates SWE, ERA5 generates comparable SWE, and the other products underestimate SWE compared to the Andes-SR.



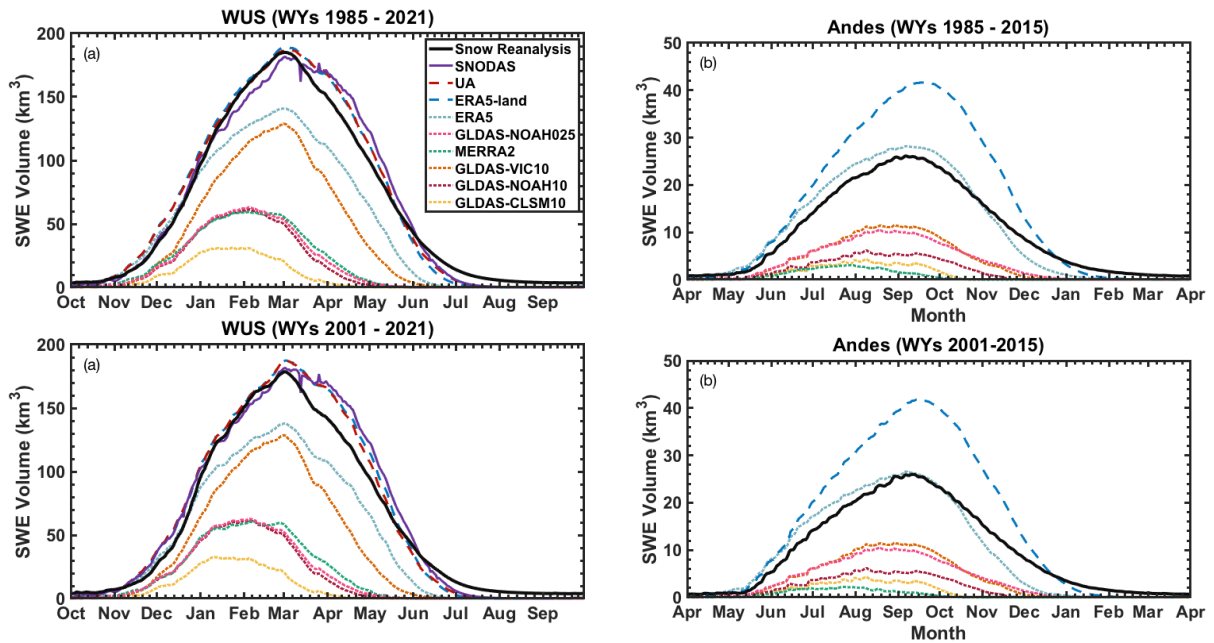

Figure S1. Climatology of seasonal cycle of SWE volume in the WUS over WYs 1985 – 2021 (a) and WYs 2001 – 2021 (b), and Andes over WYs (c) and WYs 2001 – 2015 (d). Solid lines represent high-resolution (HR) datasets and products, dashed lines represent moderate-resolution (MR) products, and dotted lines represent low-resolution (LR) products.”

- Line 171: Delete “choose to”.

“choose to” will be deleted.

- Line 179: I would think that all three resolutions (HR plus MR and LR) may straddle both windward and leeward watersheds rather than just the MR and LR resolutions. I assume you would see this if you zoomed in more in Figures S3a and S4a. Also, replace “CR” with “LR” here?

Thank you for your comments. It is true that all three resolutions would straddle both windward and leeward watersheds to varying degrees. For MR and LR products, fractional  $swe_{peak}$  is aggregated to get  $SWE_{peak}$  for each watershed. For HR products, we simply aggregate the full  $swe_{peak}$  that is within the watershed shapefile and did not compute the fractional  $swe_{peak}$ . For HR products, the spanning of windward/leeward sides has a negligible impact on the overall distribution. We propose to revise the sentence as below to avoid confusion:

“Since ~~MR and LR~~ pixels may cover both windward and leeward watersheds, for MR and LR products, fractional  $swe_{peak}$  is aggregated to get  $SWE_{peak}$  over the two types of watersheds separately (Fig. S4 and S5). For HR products and datasets the pixels spanning the windward to leeward side has a negligible impact on the distribution.”

- Line 305 and 330: I find the titles for sections 4.3.1 and 4.3.2 to be odd. Consider reducing and rewording.

Thank you for your suggestion. We will modify them for clarity as:

“Impact of accumulation-season precipitation and snowfall on annual  $SWE_{peak}$

## Impact of LSM and spatial resolution on climatological SWE<sub>peak</sub>”

- Line 310: Replace “more” with “higher”.

“more” will be replaced with “higher”.

- Line 326: Replace “is” with “are”.

“is” will be replaced with “are”.

- Lines 359-364: I would suggest elaborating a little more here on model differences.

Thank you for your suggestion, we propose to elaborate the text:

“The differences in  $R_{acc}/P_{acc}$  are  $\leq 0.1$  between GLDAS-VIC10 and GLDAS-CLSM10 in contrast to the differences of 0.2-0.3 in  $A_{acc}/S_{acc}$ . GLDAS-VIC10 tends to have higher  $P_{acc}$ ,  $S_{acc}$ , and SWE<sub>peak</sub> which are closer to those from the HR or MR snow products. The better performance of GLDAS-VIC10 than others might be associated with the usage of snow elevational bands in the VIC model, in which sub-grid snowfall and SWE estimates are better represented. GLDAS-CLSM10 has the highest rates of  $A_{acc}/S_{acc}$  and lowest SWE<sub>peak</sub>. Previous study shows a larger portion of snowfall is lost as accumulation-season ablation in the Catchment model (Xiao et al., 2021). Therefore, a better characterization of snowmelt during the accumulation season is beneficial to improve SWE<sub>peak</sub> accuracy.”

- Line 400: Replace “less” with “fewer”.

“less” will be replaced with “fewer”

- Lines 448-452: I think these sentences are not well justified and need to either be removed or better connected to the study. The study does not suggest why future/new spaceborne data are needed to assess SWE in these mountain ranges. This conclusion might have been better motivated if an existing spaceborne sensor that maps SWE (e.g., passive microwave) had been included. Multiple SWE datasets in this paper utilize existing spaceborne snow cover data (e.g. reference and SNODAS) and appear to capture certain spatial patterns like the rain shadow effect.

Thank you for your suggestions. We will rephrase these sentences to suggest the potential to use spaceborne snow measurements to constrain model-based snow estimates.

“The ability to capture orographic rainshadow patterns from snow reanalysis datasets and SNODAS encourages the usage of existing spaceborne snow covered area measurements and/or future spaceborne missions that can directly provide high-resolution SWE measurements to constrain mountain SWE.”

- Lines 473-492: It appears the ERA5 paragraph (Lines 473-485) needs to be swapped with the ERA5-Land paragraph (Lines 487-492) based on their resolutions (ERA5-Land is a MR product, ERA5 is a LR product).

Thank you for catching this. We will swap ERA-Land and ERA5. ERA5 will be placed in the LR section and ERA5-Land will be placed in MR section.

TABLE AND FIGURE COMMENTS

- Figure 1: Suggest labeling the Cascades in the WUS map since the text references them in multiple places.

Thank you for the suggestion. We will label the Cascades in Figure 1.

- Figure 7b-c: There appears to be an interesting outlier year where UA and ERA5-Land have much lower peak SWE than WUS-SR. This appears to be a high snow accumulation year. Can you please identify which year this is in the text and provide a brief discussion point about it? These products have greater correspondence to WUS-SR in most other years, so this year may be negatively skewing the error statistics.

The outlier is WY 1993 which is identified as the wettest year in WUS-SR record. It is not clear to us why UA and ERA5-Land disagree with the WUS-SR in this year. A comparison of WUS-SR and in situ peak SWE in WY 1993 shows that WUS-SR agrees with the in situ SWE with a correlation coefficient of 0.76. A negative mean difference suggests that  $SWE_{peak}$  from WUS-SR is slightly lower than that from in situ data. The reanalysis performance for this year is comparable to other years and the overall verification results.

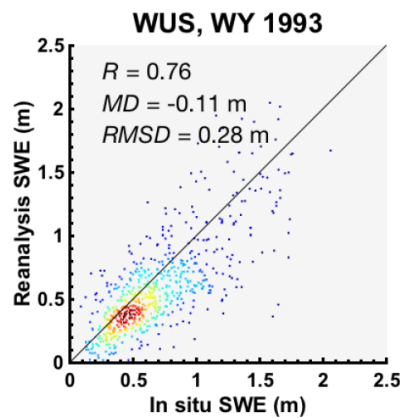

Figure R1. scatter plot of peak SWE from Reanalysis SWE and in situ SWE from SNOTEL and CDEC over the WUS in WY 1993.

Figure R2 shows that the statistics do not change much by removing the WY 1993 data points. The R values are slightly improved from 0.90 in UA and 0.91 in ERA5-Land to 0.92, whereas MD and RMSD are larger compared to the original plot including WY 1993. We propose to add the description of the outlier year in the Figure Caption:

“Figure 8. Scatter plots (a – i) of  $SWE_{peak}$  volumes between WUS-SR and other products. Each dot represents  $SWE_{peak}$  volume ( $\text{km}^3$ ) for each year over the study period (WYs 1985 to 2021) where data are available. For the SNODAS and GLDAS products, the comparison is over WYs 2005 to 2021, and 2001 to 2021, respectively. **The WY 1993  $SWE_{peak}$  in WUS-SR is the highest and much higher than those from UA and ERA5-Land. Statistics do not change significantly if excluding this data point.** (j) shows the  $SWE_{peak}$  percentiles in each WY over the overlapping period including all products (WYs 2005 to 2021).”

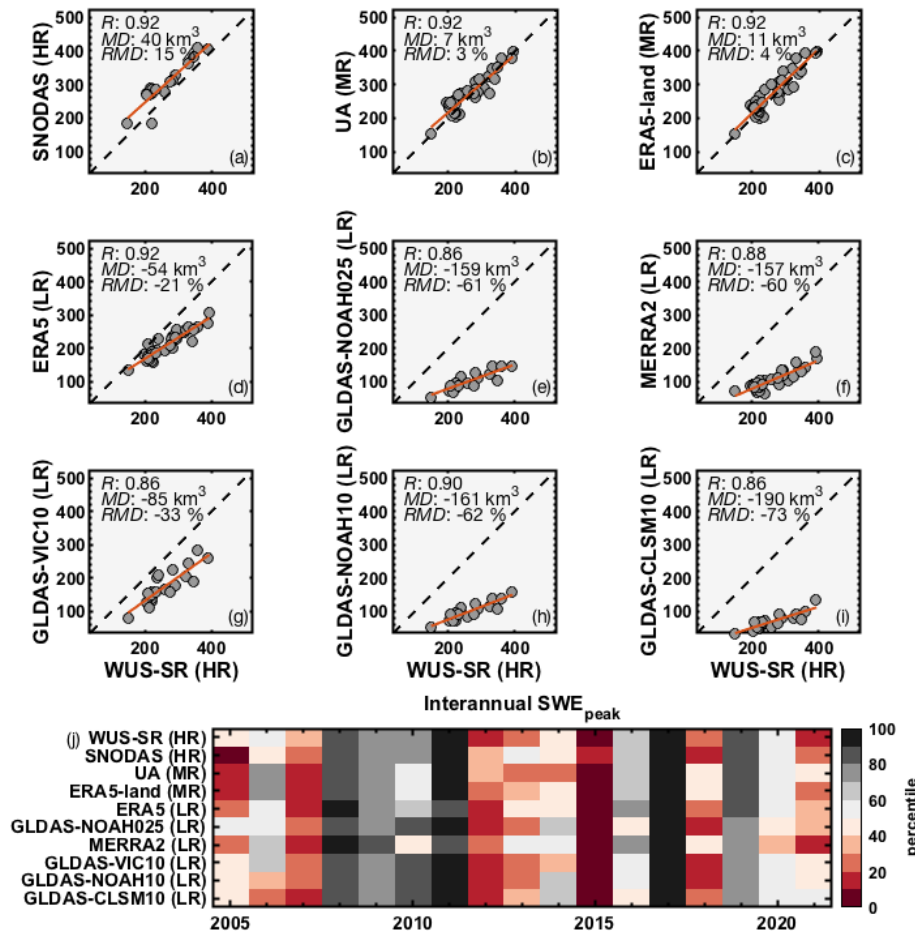

Figure R2 Same as Figure 7 but removing WY 1993.

- Figure 7 caption (line 296): Replace “is” with “are”.

“is” will be replaced with “are”.

- Figures 7j and -8a: It seems for the heat maps, a calculation of the spearman rank correlation would be useful to assess the agreement in dry to wet years for each product vs. the reference.

The spearman rank correlation for the SWE<sub>peak</sub> percentiles will be listed in Table 2 with descriptions shown below:

“Overall, dry to wet years identified from products in the WUS generally agree with the WUS-SR with a correlation coefficient above 0.8 over WYs 2005 to 2021 (Table 2). In contrast, discrepancies are evident among SWE<sub>peak</sub> percentiles computed from different products over WYs 2001 to 2021. Percentiles from ERA5-Land and GLDAS-NOAH025 agree well with the Andes-SR. However, the correlation is low between other products and Andes-SR. Although SWE<sub>peak</sub> from ERA5 has comparable climatology with Andes-SR (Figure 4i), its interannual distribution disagrees with the Andes-SR, especially after WY 2001.”

Table 2. Correlation of SWE<sub>peak</sub> percentiles of each product against the reference datasets over WYs 2005 to 2021 in the WUS, and WYs 2001 to 2021 in the Andes.

| Products      | WUS-SR | ANDES-SR |
|---------------|--------|----------|
| SNODAS        | 0.89   | -        |
| UA            | 0.86   | -        |
| ERA5-Land     | 0.91   | 0.93     |
| ERA5          | 0.95   | 0.11     |
| GLDAS-NOAH025 | 0.92   | 0.85     |
| MERRA2        | 0.87   | 0.51     |
| GLDAS-VIC10   | 0.95   | 0.60     |
| GLDAS-NOAH10  | 0.91   | 0.42     |
| GLDAS-CLSM10  | 0.84   | 0.46     |

- Figure 10: It would be helpful to include a dashed line for the  $t_{peak}$  (DOWY) of the reference data.

We will add the  $t_{peak}$  (DOWY) values of WUS-SR and Andes-SR as solid red lines in Figure 10 as shown below.

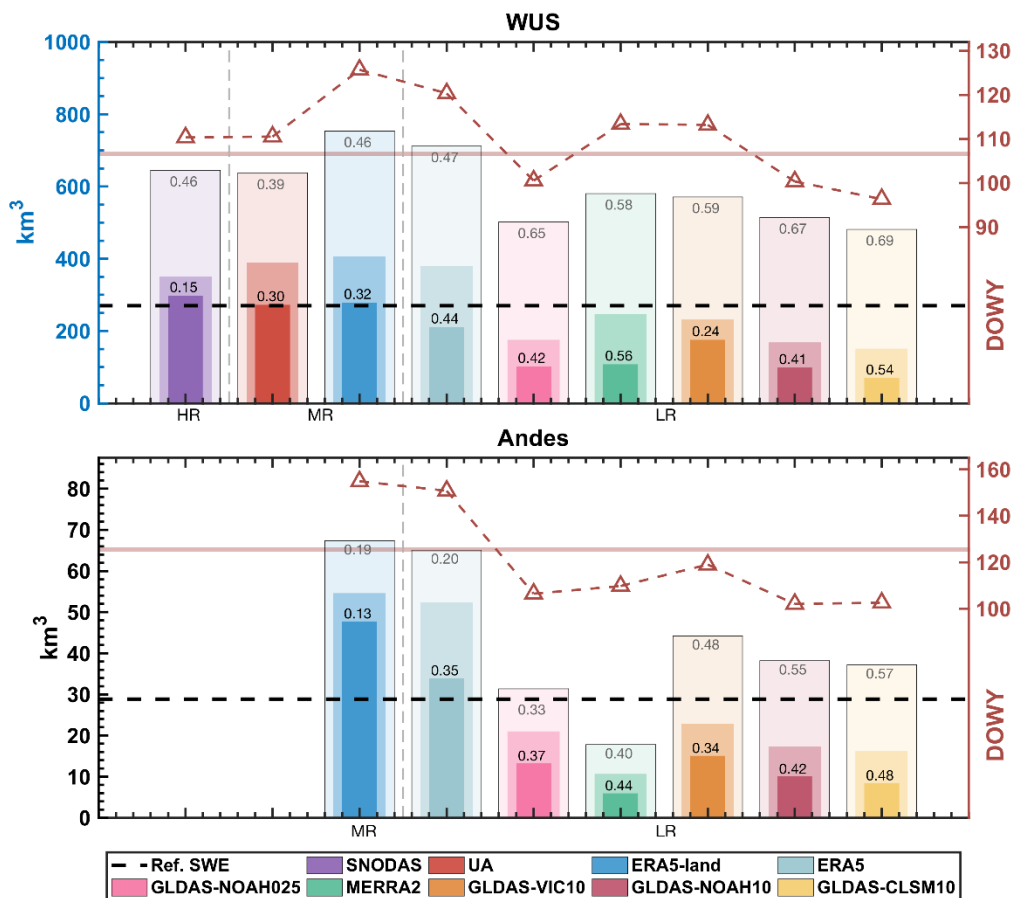

Figure 10. Climatological  $SWE_{peak}$ ,  $S_{acc}$ , and  $P_{acc}$  volumes aggregated over WUS (top panel) and Andes (bottom panel) in  $km^3$ . Red triangles (corresponding to right y-axis) show the  $t_{peak}$  averaged over all pixels and WYs. The horizontal dashed lines and red lines are the reference snow reanalysis SWE volumes and

$t_{\text{peak}}$ , respectively, from WUS-SR and Andes-SR. The vertical dashed lines group the products by spatial resolution (i.e., HR, MR, LR). The black text lists the  $A_{\text{acc}}/S_{\text{acc}}$  and gray text lists the  $R_{\text{acc}}/P_{\text{acc}}$ .
